# 1 Differentiated care for youth across the HIV care cascade in Zimbabwe

2

3 Chido Dziva Chikwari<sup>1,2\*</sup>, Katharina Kranzer<sup>1,3,4\*</sup>, Victoria Simms<sup>1,2</sup>, Amani Patel<sup>2</sup>,  
4 Mandikudza Tembo<sup>1,2</sup>, Owen Mugurungi<sup>5</sup>, Edwin Sibanda<sup>6</sup>, Onismo Mufare<sup>1</sup>, Lilian Ndlovu<sup>1</sup>,  
5 Joice Muzangwa<sup>1</sup>, Rumbidzayi Vundla<sup>1</sup>, Abigail Chibaya<sup>1</sup>, Richard Hayes<sup>2</sup>, Constance  
6 Mackworth-Young<sup>1,7</sup>, Sarah Bernays<sup>8</sup>, Constancia Mavodza<sup>1,2</sup>, Fadzanayi Hove<sup>1</sup>, Tsitsi  
7 Bandason<sup>1</sup>, Ethel Dauya<sup>1</sup>, Rashida Abbas Ferrand<sup>1,3</sup>

8

## 9 Affiliations:

10 <sup>1</sup>The Health Research Unit Zimbabwe, Biomedical Research and Training Institute, Harare,  
11 Zimbabwe

12 <sup>2</sup>MRC International Statistics and Epidemiology Group, Department of Infectious Disease  
13 Epidemiology, London School of Hygiene and Tropical Medicine, London, UK

14 <sup>3</sup>Department of Clinical Research, London School of Hygiene and Tropical Medicine, London,  
15 UK

16 <sup>4</sup>Department of Infectious Diseases and Tropical Medicine, Ludwig-Maximilians-Universität,  
17 Munich, Germany

18 <sup>5</sup>AIDS and TB Unit, Ministry of Health and Child Care, Harare, Zimbabwe

19 <sup>6</sup>City Health Department, Bulawayo City Council, Bulawayo, Zimbabwe

20 <sup>7</sup>Department of Global Health and Development, London School of Hygiene and Tropical  
21 Medicine, London, UK

22 <sup>8</sup>Faculty of Medicine and Health, University of Sydney, Sydney, Australia

23

24 \*NOTE: This preprint reports new research that has not been certified by peer review and should not be used to guide clinical practice.

Equally contributing

25

26 **Corresponding author**

27 Chido Dziva Chikwari

28 London School of Hygiene and Tropical Medicine

29 Keppel Street

30 London WC1E 7HT

31 E-Mail: [chido.dzivachikwari@lshtm.ac.uk](mailto:chido.dzivachikwari@lshtm.ac.uk)

32

33 **Keywords**

34 HIV, adolescents, youth, differentiated care, Zimbabwe, viral suppression

35

36

37 Words: 3535

38 Abstract: 259

39 Figures: 2

40 Table: 1

41 Reference: 37

42 **Abstract**

43

44 **Introduction**

45 Youth living with HIV are at higher risk than adults of disengaging from HIV care.

46 Differentiated models of care such as community antiretroviral therapy (ART) may improve  
47 treatment outcomes, including viral suppression.

48 **Methods**

49 This study was nested in a cluster-randomised controlled trial (CHIEDZA:  
50 Clinicaltrials.gov, Registration Number: NCT03719521) which was conducted in Harare,  
51 Bulawayo and Mashonaland East Provinces in Zimbabwe and aimed to investigate the impact  
52 of a youth-friendly community-based package of HIV services, integrated with sexual and  
53 reproductive health services for youth (16–24 years), on population-level HIV viral load (VL).  
54 HIV services included HIV testing, ART initiation and continuous care, VL testing, and  
55 adherence support. Coverage percentages across the HIV care cascade were analysed.

56 **Results**

57 Overall 377 youth were newly diagnosed with HIV at CHIEDZA, linkage to HIV care was  
58 confirmed for 265 (70.7%, 234 accessed care at CHIEDZA and 31 with other providers); 250  
59 (94.3%) started ART. Among those starting ART at CHIEDZA attrition within 6 months of  
60 starting ART was 38% and viral suppression (<1000 copies/ml) among those who had a test at  
61 6 months was 90%. In addition 1162 youth already diagnosed with HIV accessed CHIEDZA;  
62 714 (61.4%) had a VL test, of those 565 (79.1%) were virally suppressed.

63 **Conclusion**

64 This study shows that provision of differentiated services for youth in the community is  
65 feasible. Linkage to care and retention during the initial months of ART was the main

66 challenge as has been shown in other studies. Retention throughout the HIV-care journey for  
67 youth needs to become a priority programme goal to achieve the ambitious 95-95-95 UNAIDS  
68 targets.

## 69 Introduction

70

71 In 2019, an estimated 3.9 million young people (aged 15-24 years) were living with HIV  
72 globally, the majority in Southern Africa.(1) Young people continue to be the age group with  
73 the highest HIV incidence, especially among women who experience three times higher  
74 incidence than males of the same age.(2)

75

76 In 2014, UNAIDS set the 90-90-90 target aiming for 90% of people living with HIV to be aware  
77 of their HIV status, 90% of people diagnosed with HIV to be on antiretroviral therapy (ART),  
78 and 90% of those people on ART to have suppressed HIV viral load by 2020.<sup>(3)</sup> These targets  
79 were followed by the even more ambitious 95-95-95 targets, to be achieved by 2025.(4) While  
80 Southern African countries have made great progress towards the 90-90-90 targets, progress  
81 has been much slower for young people living with HIV in the region.(5-10) Young people face  
82 challenges across each step of the HIV care cascade beginning with knowing their HIV status  
83 through testing, timely and continuous access to treatment, and optimal care outcomes  
84 including viral suppression.(11-16) Successful interventions to increase testing and  
85 knowledge of HIV status among young people have included community-based HIV testing  
86 services including HIV self-testing offered at home, through outreach programmes, at  
87 educational facilities and at fixed community locations.(17-21) Few studies aimed at  
88 addressing the gap for young people in the 'first 95' (knowledge of HIV status) have also  
89 reported linkage to and continuous engagement in HIV care.(17)

90

91 Although retention in long-term HIV care remains one of the most difficult challenges across  
92 all age groups, young people are more likely than any other age group to disengage. Barriers

93 to their retention include financial dependency, stigma, health services that are not youth  
94 friendly and incompatible with school attendance, and adolescent development adjustments  
95 as they transition to adulthood.(22-24) Importantly the bulk of attrition occurs before ART  
96 initiation and within the first 6 months on treatment.(12, 25) There is a recognised need for  
97 concentrated attention on health-care approaches to HIV service delivery for young people  
98 to bridge these gaps.(26)

99

100 Simplified and patient-centred care options tailored to each stage of the patient care journey  
101 ('differentiated models of service delivery') aimed at improving engagement and retention in  
102 care have been developed for and tested among adults living with HIV. However, few  
103 differentiated models of care specifically targeting young people have been described and  
104 data on the implementation and effectiveness of these interventions remain scarce.(27)

105

106 In this paper, we describe the results of a differentiated model of service delivery offering  
107 community-based HIV and VL testing, linkage to care, ART initiation, HIV care and health-care  
108 worker managed adherence groups for young people living with HIV aged 16-24 years in three  
109 provinces in Zimbabwe.

110

## 111 **Methods**

112

### 113 ***Trial design, intervention and setting***

114

115 This study was nested within a cluster randomised trial (CHEIDZA) conducted in three urban  
116 and peri urban provinces across Zimbabwe, each province containing 8 clusters randomised

117 4:4 to control (existing health services) or intervention clusters.(28) The trial aimed to  
118 investigate the impact of a comprehensive community-based package of HIV services,  
119 integrated with sexual and reproductive health services and general health counselling for  
120 youth aged 16–24 years, on population-level HIV viral suppression. A cluster was defined as a  
121 geographically demarcated area with a multi-purpose community centre. In intervention  
122 clusters, weekly integrated HIV and sexual and reproductive health services were delivered  
123 from this centre to cluster residents aged 16-24 years. Services included HIV testing, HIV  
124 treatment and adherence support for those living with HIV, contraception, menstrual hygiene  
125 management, syndromic management of sexually transmitted infections, risk reduction and  
126 general health counselling offered by a multidisciplinary team of service providers over 30  
127 months.(28)

128  
129 The intervention was specifically configured to be “youth friendly” i.e. able to effectively  
130 attract youth, meet their needs responsively and retain them in care. Part of the youth  
131 friendliness was a focus on intervention providers; the intervention team was selected based  
132 on prior experience of working in communities and with youth. A training programme on each  
133 of the intervention components was combined with training on provision of youth friendly  
134 services, particularly focusing on communication and counselling that is appropriate to age  
135 and maturity, LGBTQI+ sensitivity and attitudinal training specifically emphasizing respect,  
136 confidentiality, non-judgement, and relatability. Debrief meetings for the intervention teams  
137 were held every 1-2 weeks and incorporated problem-solving, discussion of complex cases  
138 and operational issues to ensure that intervention providers were supervised and mentored.  
139 The start of the intervention period was staggered, with Harare province starting on 1 April  
140 2019, followed three and six months later in Bulawayo and Mashonaland East provinces

141 respectively. The intervention period ended on 31 March 2022. All services were voluntary  
142 and offered free of cost.

143

#### 144 ***HIV testing and care services***

145

146 HIV testing was conducted according to national guidelines.(29) Those who tested HIV-  
147 positive were offered a choice of being referred to a primary care clinic (PCC) of their choice  
148 (accompanied to the PCC by a CHIEDZA member of staff to help facilitate linkage to care) or  
149 of accessing care in the community through CHIEDZA. If the latter was selected, the young  
150 person was assigned a national programme number and their HIV records were maintained  
151 at the PCC. For those who accessed care through CHIEDZA ART was supplied by the PCC  
152 through the national HIV programme. CHIEDZA staff updated the PCC data when they  
153 collected ART for supply through CHIEDZA. This ensured that young people remained part of  
154 the national HIV programme allowing them to transition to receiving care from any PCC of  
155 their choice at the end of the trial. HIV treatment was provided according to national  
156 guidelines(30) and there were referral pathways to a health facility for any clinical indications  
157 (e.g., severe toxicity, incident symptoms, suspected treatment failure). A point-of-care CD4  
158 count was done at time of diagnosis or ART initiation at the CHIEDZA site. Those with a CD4  
159 count <100 cells/uL had a serum cryptococcal antigen test. All young people initiated on ART  
160 had a WHO tuberculosis symptom screen. Those with a positive symptom screen were further  
161 investigated for tuberculosis as clinically indicated including sputum Xpert MTB/Rif testing,  
162 chest X-rays and/or investigations for extrapulmonary tuberculosis done offsite at a local  
163 laboratory.

164



165 Young people newly diagnosed with HIV or known positive but not on ART were followed by  
166 telephone and / or home visits if they did not attend scheduled appointments. There was no  
167 defined protocol for follow up, however, multiple attempts were made to contact a person  
168 and facilitate linkage to care.

169

170 Young people living with HIV and already accessing care outside CHIEDZA were encouraged  
171 to remain with their routine care provider. However, those who wished to transfer care to  
172 CHIEDZA were able to do so.

173

174 Young people living with HIV (regardless of whether they accessed HIV care through CHIEDZA  
175 or not) were offered free HIV VL testing after 6 months on ART (from September 2019). VL  
176 testing was done offsite with results available within approximately one week. Enhanced  
177 adherence counselling was provided at CHIEDZA if not virally suppressed (>1000 copies/ml) as  
178 per Zimbabwe national guidelines. All youth living with HIV were invited to join CHIEDZA  
179 Adolescent Peer Support (CAPS) group that were modelled on the existing Community ART  
180 Refill Groups (CARGs) implemented in Zimbabwe .(31) CAPS comprised a group of young  
181 people with HIV who met on a regular basis to discuss issues relevant to youth and engage in  
182 social activities as a model of receiving peer support. The group facilitator was a CHIEDZA staff  
183 member.

184

### 185 **Outcomes**

186

187 Clients were defined as previously diagnosed with HIV based on self-report, and as newly  
188 diagnosed if they self-reported negative or unknown HIV status and then tested HIV positive

189 at the CHIEDZA service. Clients who did not link to care at CHIEDZA were asked to leave a  
190 contact phone number, and were followed up to determine whether they linked to care  
191 elsewhere. Clients were coded as linked to care elsewhere if they ever reported that they  
192 were receiving HIV service from another provider, with no time limit. Similarly, clients were  
193 coded as linked to care at CHIEDZA if they ever took up HIV care at CHIEDZA. Clients who did  
194 not leave contact information were coded as having unknown outcome and those who were  
195 contacted at least once but stopped responding thereafter were coded as lost to follow-up.  
196 Clients living with HIV, whether newly diagnosed or previously diagnosed, who opted to  
197 receive HIV care at CHIEDZA were allocated a 4-digit ID number. They were referred to as the  
198 CHIEDZA HIV cohort.

199  
200 All clients on ART, including those not linked to care at CHIEDZA, were eligible for a VL test  
201 after 6 months on ART, however, clients in the CHIEDZA HIV cohort were ineligible for VL  
202 testing if they transferred elsewhere before completing 6 months on ART at CHIEDZA, or if  
203 the CHIEDZA service closed before they completed 6 months on ART. In addition, clients who  
204 received HIV care elsewhere were not eligible for VL testing if they attended CHIEDZA before  
205 September 2019. Viral suppression was defined as a VL <1000 copies/ml.

206

### 207 ***Data management and statistical analysis***

208

209 Information on CHIEDZA service uptake and minimal demographic information, (sex, date of  
210 birth) was collected from all CHIEDZA attendees via an electronic tablet and linked to a  
211 fingerprint ID. HIV cohort members were asked to complete an additional electronic case  
212 report form (CRF) at baseline and at each subsequent visit capturing sociodemographic and

213 clinical information. Separate paper CRFs captured VL and CD4 test results. These were  
214 entered into a purpose-built database by data clerks.

215

216 Clients in the CHIEDZA HIV cohort were identified by their 4-digit ID number. Those who  
217 received HIV care elsewhere were identified by the first eight characters of their fingerprint  
218 ID.

219

220 The CHIEDZA staff followed up clients to ascertain whether they had linked to care and  
221 initiated ART elsewhere, or whether they had relocated, refused to respond, were not ready  
222 to initiate ART, or had been referred for another condition. Participants who could not be  
223 traced because they did not supply contact details were coded unknown. This information  
224 was compiled in a spreadsheet by the data manager and merged with the main dataset.

225

## 226 ***Ethics***

227

228 Ethical approval for the CHIEDZA study was obtained from the Medical Research Council of  
229 Zimbabwe [MRCZ/A/2387], the Biomedical Research and Training Institute Institutional  
230 Review Board [AP149/2018] and the London School of Hygiene & Tropical Medicine Ethics  
231 Committee [16124/RR/11602]. All intervention attendees provided verbal consent for  
232 services. The requirement for guardian consent to access services for 16–18-year-olds was  
233 waived by the ethics committees.

234

## 235 ***Role of funding source***

236

237 The funders of the study had no role in study design, data collection, data analysis, data  
238 interpretation, writing of the report, or the decision to submit the study for publication.

239

## 240 **Results**

241

242 A total of 377 young people were newly diagnosed with HIV at CHIEDZA, while an additional  
243 1162 young people living with HIV accessed the CHIEDZA service during the intervention (April  
244 2019-May 2022) (Figure 1). Among those newly diagnosed 265/377 (70.3%) decided to access  
245 care at CHIEDZA (n=234) or with other service providers (n=31). Among the remaining 112  
246 (29.7%) 74 did not link to care and for 38 linkage was unknown (Figure 1, Table 1). Young  
247 people who did not link to care: i) said they were not ready to start ART (n=11), ii) refused to  
248 be contacted again, but were not on ART at the last contact (n=14) or iii) were initially  
249 contactable following the positive HIV test, but were eventually lost to follow-up after  
250 multiple contacts encouraging them to link to care (n=49). Those whose linkage status was  
251 unknown: i) had relocated to another community (n=4), ii) lived outside the intervention  
252 cluster (n=5) iii) had been referred to other service providers (n=8) or iv) had left the CHIEDZA  
253 service after having tested HIV positive without providing any contact information (n=21).

254

255 A minority of young people newly diagnosed with HIV and linked to care (9/234 (3.8%) linking  
256 to CHIEDZA and 6/31 (19.4%) linked to other providers) did not start ART during follow-up.  
257 Among those who started ART in CHIEDZA, 48 were either transferred out or did not have  
258 enough follow-up time (<6 months) to be eligible for a VL test. In addition 68/177 (38%) did  
259 not attend follow-up visits at CHIEDZA six months after starting ART and their ART status  
260 thereafter was unknown. Among those who stayed in care with CHIEDZA >6 months after

261 starting ART VL suppression was 90% (96/107). Using <20 copies per ml as the cut off; viral  
262 suppression in this group was 78% (83/107).

263

264 A small number (66/1162, 5.7%) of young people previously diagnosed with HIV transferred  
265 their care to CHIEDZA, their viral suppression was 88% (50/57). Among eligible young people  
266 previously diagnosed with HIV and receiving care from other providers 65.4%) (657/1004)  
267 were offered and agreed to have a viral load test. Viral suppression was 77% (508/657).

268

269 Table 1 describes the baseline characteristics of young people newly diagnosed with HIV and  
270 those with a known HIV positive status. The majority of young people identified with HIV were  
271 women (newly diagnosed 336/377, 89% and previously diagnosed 1035/1156, 89%) and the  
272 majority were aged 20-24 (newly diagnosed 263/377, 70%, and previously diagnosed  
273 828/1156, 76%). 16-19 year olds newly diagnosed with HIV were less likely to link to care than  
274 those aged  $\geq 20$  years. CD4 counts were available for 228/234 newly diagnosed young people  
275 linked to care in CHIEDZA: 22 (20%), 101 (44%) and 105 (46%) had CD4 counts of <200, 200-  
276 499, >500 cells/uL respectively. Of the 4 young people with a CD4 count <100 cells/uL 3 had  
277 a serum cryptococcal antigen test, and all of those tests were negative. No young person was  
278 diagnosed with tuberculosis through CHIEDZA.

279

280 Few young people already in care with other providers transferred their care to CHIEDZA.  
281 Transfer was more frequent in Mashonaland East 53/428 (12%) compared to other provinces.  
282 Of 1539 young people living with HIV who accessed CHIEDZA 323 (21%) registered with CAPS.  
283 CAPs registration was more frequent among those accessing HIV care at CHIEDZA (110/300,  
284 37%) compared to those accessing HIV care from other providers (213/111, 19%). A total of

285 32 CAPS sessions with a total of 734 attendances were held across the three provinces (Figure  
286 2). National and local lockdowns due to the COVID-19 pandemic severely affected CAPS  
287 groups both with regards to hosting the events and attendance.

288

## 289 **Discussion**

290 We report outcomes across the HIV care cascade from a differentiated service delivery model  
291 for young people and co-developed with young people. The CHIEDZA intervention offered HIV  
292 testing integrated with sexual and reproductive health services, ART initiation, treatment  
293 monitoring (HIV VL testing) and adherence support (CAPS groups) in the community.  
294 Importantly the service was not just youth friendly, but offered choice and service providers  
295 respected young people's autonomy. For example young people newly diagnosed with HIV  
296 who linked to care within CHIEDZA were provided with continuous care and services  
297 regardless of their decision on whether to start ART. Among young people who were newly  
298 diagnosed with HIV, 70.3% were confirmed to have linked to care, among those linked to care  
299 94.3% started ART and among those starting ART at CHIEDZA and who remained in care  
300 beyond six months 89.7% were virally suppressed. However, a considerable proportion of  
301 young people either did not link to care or their linkage status was unknown. Some of them  
302 found it difficult to accept the diagnosis and either refused further contact or left the services  
303 without providing any contact information. Importantly 38% of young people newly  
304 diagnosed with HIV disengaged from care within the first six months of having initiated ART.  
305 In addition early attrition from ART is common among young people and has been reported  
306 from other countries and settings.(11, 12, 25, 32) Part of investing in retaining youth newly  
307 diagnosed with HIV in care is potentially doing further work in preparing young people for the  
308 implications of testing by ensuring there is more in place at the point of testing to improve

309 HIV treatment literacy and protect against individuals disengaging after testing.(11) This could  
310 be nested within HIV pre-test counselling and incorporate messaging about viral suppression  
311 and U=U.

312

313 Linkage to care following HIV testing in the community is challenging. Those accessing  
314 community HIV testing services are less drawn to clinic-based services otherwise they would  
315 have tested at a clinic. Additionally, community-based services often cannot provide the same  
316 level of services with regards to frequency (5-6 days per week) and working hours as clinic-  
317 based services and therefore linkage to care and ART initiation is rarely offered as part of  
318 community-based services. A systematic review including 14 studies focused on community-  
319 based HIV testing reported proportions linked-to-care ranging from 10–79% over 1–12  
320 months of observation.(33) None of the studies included in the review focused exclusively on  
321 young people and adolescents (16-17 year olds) were generally excluded. A more recent study  
322 “PopART for Youth” (P-ART-Y) delivered a combination HIV prevention package to 10-19 year  
323 olds in Zambia and South Africa via a door-to-door approach. The prevention package  
324 included HIV testing, supported linkage to care for those living with HIV and ongoing ART  
325 adherence support. In a before/after comparison ART coverage among adolescents living with  
326 HIV increased from 61.3% in Zambia and 65.6% in South Africa to 78.7% in Zambia and 87.8%  
327 in South Africa after one year of the intervention. While the intervention had the biggest  
328 impact on the first 90% (adolescents with HIV knowing their status), linkage to care must have  
329 been effective in order to increase ART coverage overall.(17)

330

331 Few studies have investigated the feasibility and outcomes of ART initiation in the community  
332 and those did focused on adults only.(34-36) Two studies investigated the feasibility of

333 initiating ART in the community either following an HIV self-test in Malawi(35) or in the  
334 context of door-to-door HIV testing in Lesotho(36) with follow-up care provided at the clinic.  
335 ART initiation was increased in both studies and viral suppression (<100 copies per ml) 12  
336 months post diagnosis was higher (50.4%) in the community ART initiation group compared  
337 to the standard of care group (34.3%) in Lesotho. Barnabas et al investigated the effect of  
338 community- compared to clinic-based ART delivery (i.e. initiation and ongoing care) on viral  
339 suppression among adults newly diagnosed with HIV in Uganda and South Africa.(34)  
340 Participants enrolled in the trial were diagnosed at clinics, through HIV testing at community  
341 locations and at home including distribution of HIV self-test kits. Data on linkage to care were  
342 not available. However among those initiating ART viral suppression (<20 copies per ml) at 12  
343 months was 74% among those receiving community-based ART compared to 63% among  
344 those receiving clinic-based ART. Reanalysing our data using the same cut-point for viral  
345 suppression (<20 copies per ml) and among those who did have an HIV viral load the  
346 prevalence of viral suppression in young people newly diagnosed with HIV was 78% (83/107).  
347 This is comparable with the results achieved in adults in Uganda and South Africa, however,  
348 it does not take into consideration young people who have not been linked to care.  
349  
350 The CHIEDZA trial actively sought to limit the disruption of existing service provision. Thus  
351 young people previously diagnosed with HIV and in care with other service providers were  
352 encouraged to remain with their providers. This was largely achieved as evidenced by only 6%  
353 of young people living with HIV transferring their care to CHIEDZA. However, CHIEDZA offered  
354 additional services for those known to be HIV positive including community based HIV VL  
355 testing, adherence counselling if found to be unsuppressed and adherence and peer support  
356 through the CAPS groups. HIV VL testing at CHIEDZA was taken up by two thirds of eligible



357 young people known to be HIV positive and 77.3% were found to be virologically suppressed  
358 which is in line with most of the estimates in this age group.(14, 37) A minority of young  
359 people newly diagnosed or known HIV positive registered with CAPS. Possible reasons for  
360 limited uptake of CAPS was the distance from young people’s homes to the CHIEDZA centre,  
361 the interruptions caused by COVID19 lockdowns and prevailing transport restrictions due to  
362 the pandemic.

363  
364 This paper did not have a standard of care group and thus we could not compare outcomes  
365 of young people receiving community-based with those who received clinic-based ART.  
366 However, the viral suppression rates among those who were previously diagnosed and in care  
367 somewhere else were comparable with those receiving care at CHIEDZA. Also the small  
368 sample size and limited sociodemographic variables available did not allow a more in-depth  
369 analysis of risk factors for not linking to care.

370

### 371 **Conclusion**

372 Our study provides evidence that provision of differentiated services for young people in the  
373 community is feasible across the whole HIV care cascade. In an era of widely available and  
374 free HIV testing young people diagnosed with HIV through a community based service are by  
375 definition harder to reach than those already diagnosed. Hence the linkage, retention and  
376 viral suppression outcomes achieved through this differentiated service delivery model  
377 among young people newly diagnosed with HIV need to be appraised in this context.  
378 Retention throughout the HIV-care journey for young people needs to become a priority  
379 programme goal in order to achieve the new UNAIDS 95-95-95 targets which are far from

380 being reached among young people. Particular attention must be given to ensure young  
381 people newly diagnosed with HIV are linked to and retained in care.

382

### 383 **Acknowledgements**

384 The Authors would like to acknowledge all the CHIEDZA clients, communities and staff for  
385 their contribution to this study.

### 386 **Authorship**

387 RAF and RH conceptualised this study. RAF, MT, CMY, TB, CM and ED designed the study  
388 methodology. CDC and KK wrote the first draft of this manuscript. CDC, ED, OM and ES were  
389 responsible for oversight of the study implementation and administration with support from  
390 MT and CM. VS, TB and AP conducted data analysis. SB and CMY were responsible for the  
391 study process evaluation. FH, OM, LN, JM, RV and AC were responsible for the day to day  
392 activities of the study.

### 393 **Source of Funding**

394 The CHIEDZA study is funded by the Wellcome Trust (Senior Fellowship to RAF:  
395 206316/Z/17/Z). VS and RH were partially supported by the UK Medical Research Council  
396 (MRC) and the UK Department for International Development (DFID) under the MRC/DFID  
397 Concordat agreement which is also part of the EDCTP2 programme supported by the  
398 European Union Grant Ref: MR/R010161/1.

399

400

401

402

## Reference

1. Young people and HIV. Geneva: Joint United Nations Programme on HIV/AIDS (UNAIDS; 2021.
2. UNAIDS DATA. UNAIDS, Geneva, Switzerland; 2022.
3. 90-90- 90 An ambitious treatment target to help end the AIDS epidemic. Geneva: Joint United Nations Programme on HIV/AIDS (UNAIDS). ; 2014.
4. 2025 AIDS Targets. UNAIDS, Geneva, Switzerland; 2020.
5. Summary sheet: Zimbabwe population-based HIV impact assessment ZIMPHIA 2020. 2020.
6. Summary sheet: Lesotho population-based HIV impact assessment LePHIA 2020. 2021.
7. Summary sheet: Malawi population-based HIV impact assessment MPHIA 2020-2021. 2022.
8. Summary sheet: Mozambique population-based HIV impact assessment INSIDA 2021. 2022.
9. Summary sheet: Uganda population-based HIV impact assessment UPHIA 2020-2021. 2022.
10. Chipanta D, Amo-Agyei S, Giovenco D, Estill J, Keiser O. Socioeconomic inequalities in the 90-90-90 target, among people living with HIV in 12 sub-Saharan African countries - Implications for achieving the 95-95-95 target - Analysis of population-based surveys. *EClinicalMedicine*. 2022;53:101652.
11. Boeke CE, Nabitaka V, Rowan A, Guerra K, Kabbale A, Asire B, et al. Assessing linkage to and retention in care among HIV patients in Uganda and identifying opportunities for health systems strengthening: a descriptive study. *BMC Infect Dis*. 2018;18(1):138.
12. Lamb MR, Fayorsey R, Nuwagaba-Biribonwoha H, Viola V, Mutabazi V, Alwar T, et al. High attrition before and after ART initiation among youth (15-24 years of age) enrolled in HIV care. *Aids*. 2014;28(4):559-68.
13. Desmonde S, Tanser F, Vreeman R, Takassi E, Edmonds A, Lumbiganon P, et al. Access to antiretroviral therapy in HIV-infected children aged 0-19 years in the International Epidemiology Databases to Evaluate AIDS (IeDEA) Global Cohort Consortium, 2004-2015: A prospective cohort study. *PLoS Med*. 2018;15(5):e1002565.
14. Low A, Teasdale C, Brown K, Barradas DT, Mugurungi O, Sachatp K, et al. Human Immunodeficiency Virus Infection in Adolescents and Mode of Transmission in Southern Africa: A Multinational Analysis of Population-Based Survey Data. *Clin Infect Dis*. 2021;73(4):594-604.
15. Leshargie CT, Demant D, Burrowes S, Frawley J. The proportion of loss to follow-up from antiretroviral therapy (ART) and its association with age among adolescents living with HIV in sub-Saharan Africa: A systematic review and meta-analysis. *PLoS One*. 2022;17(8):e0272906.
16. Haas AD, Radin E, Hakim AJ, Jahn A, Philip NM, Jonnalagadda S, et al. Prevalence of nonsuppressed viral load and associated factors among HIV-positive adults receiving antiretroviral therapy in Eswatini, Lesotho, Malawi, Zambia and Zimbabwe (2015 to 2017): results from population-based nationally representative surveys. *J Int AIDS Soc*. 2020;23(11):e25631.

17. Shanaube K, Macleod D, Chaila MJ, Mackworth-Young C, Hoddinott G, Schaap A, et al. HIV Care Cascade Among Adolescents in a "Test and Treat" Community-Based Intervention: HPTN 071 (PopART) for Youth Study. *J Adolesc Health*. 2021;68(4):719-27.
18. Shanaube K, Schaap A, Chaila MJ, Floyd S, Mackworth-Young C, Hoddinott G, et al. Community intervention improves knowledge of HIV status of adolescents in Zambia: findings from HPTN 071-PopART for youth study. *Aids*. 2017;31 Suppl 3(Suppl 3):S221-s32.
19. Mukora-Mutseyekwa F, Mundagowa PT, Kangwende RA, Murapa T, Tirivavi M, Mukuwapasi W, et al. Implementation of a campus-based and peer-delivered HIV self-testing intervention to improve the uptake of HIV testing services among university students in Zimbabwe: the SAYS initiative. *BMC Health Serv Res*. 2022;22(1):222.
20. McHugh G, Koris A, Simms V, Bandason T, Sigwadhi L, Ncube G, et al. On Campus HIV Self-Testing Distribution at Tertiary Level Colleges in Zimbabwe Increases Access to HIV Testing for Youth. *J Adolesc Health*. 2023;72(1):118-25.
21. Hensen B, Phiri M, Schaap A, Sigande L, Simwinga M, Floyd S, et al. Uptake of HIV Testing Services Through Novel Community-Based Sexual and Reproductive Health Services: An Analysis of the Pilot Implementation Phase of the Yathu Yathu Intervention for Adolescents and Young People Aged 15-24 in Lusaka, Zambia. *AIDS Behav*. 2022;26(1):172-82.
22. Chem ED, Ferry A, Seeley J, Weiss HA, Simms V. Health-related needs reported by adolescents living with HIV and receiving antiretroviral therapy in sub-Saharan Africa: a systematic literature review. *J Int AIDS Soc*. 2022;25(8):e25921.
23. MacCarthy S, Saya U, Samba C, Birungi J, Okoboi S, Linnemayr S. "How am I going to live?": exploring barriers to ART adherence among adolescents and young adults living with HIV in Uganda. *BMC Public Health*. 2018;18(1):1158.
24. Casale M, Cluver L, Boyes M, Toska E, Gulaid L, Armstrong A, et al. Bullying and ART Nonadherence Among South African ALHIV: Effects, Risks, and Protective Factors. *J Acquir Immune Defic Syndr*. 2021;86(4):436-44.
25. Maskew M, Bor J, MacLeod W, Carmona S, Sherman GG, Fox MP. Adolescent HIV treatment in South Africa's national HIV programme: a retrospective cohort study. *Lancet HIV*. 2019;6(11):e760-e8.
26. Enane LA, Davies MA, Leroy V, Edmonds A, Apondi E, Adedimeji A, et al. Traversing the cascade: urgent research priorities for implementing the 'treat all' strategy for children and adolescents living with HIV in sub-Saharan Africa. *J Virus Erad*. 2018;4(Suppl 2):40-6.
27. Maskew M, Technau K, Davies MA, Vreeman R, Fox MP. Adolescent retention in HIV care within differentiated service-delivery models in sub-Saharan Africa. *Lancet HIV*. 2022;9(10):e726-e34.
28. Dziva Chikwari C, Dauya E, Bandason T, Tembo M, Mavodza C, Simms V, et al. The impact of community-based integrated HIV and sexual and reproductive health services for youth on population-level HIV viral load and sexually transmitted infections in Zimbabwe: protocol for the CHIEDZA cluster-randomised trial [version 1; peer review: 1 approved]. *Wellcome Open Research*. 2022;7(54).
29. Zimbabwe National Guidelines on HIV Testing and Counselling. Harare, Zimbabwe: Ministry of Health and Child Care; 2014.
30. Guidelines for Antiretroviral Therapy for the Prevention and Treatment of HIV in Zimbabwe. . National Medicines and Therapeutics Policy Advisory Committee (NMTPAC) and The AIDS and TB Directorate, Ministry of Health and Child Care, Zimbabwe; 2016.

31. Bochner AF, Meacham E, Mhungu N, Manyanga P, Petracca F, Muserere C, et al. The rollout of Community ART Refill Groups in Zimbabwe: a qualitative evaluation. *J Int AIDS Soc.* 2019;22(8):e25393.
32. Wilson KS, Mugo C, Moraa H, Onyango A, Nduati M, Inwani I, et al. Health provider training is associated with improved engagement in HIV care among adolescents and young adults in Kenya. *Aids.* 2019;33(9):1501-10.
33. Sabapathy K, Hensen B, Varsaneux O, Floyd S, Fidler S, Hayes R. The cascade of care following community-based detection of HIV in sub-Saharan Africa - A systematic review with 90-90-90 targets in sight. *PLoS One.* 2018;13(7):e0200737.
34. Barnabas RV, Szpiro AA, van Rooyen H, Asiimwe S, Pillay D, Ware NC, et al. Community-based antiretroviral therapy versus standard clinic-based services for HIV in South Africa and Uganda (DO ART): a randomised trial. *Lancet Glob Health.* 2020;8(10):e1305-e15.
35. MacPherson P, Laloo DG, Webb EL, Maheswaran H, Choko AT, Makombe SD, et al. Effect of optional home initiation of HIV care following HIV self-testing on antiretroviral therapy initiation among adults in Malawi: a randomized clinical trial. *Jama.* 2014;312(4):372-9.
36. Labhardt ND, Ringera I, Lejone TI, Klimkait T, Muhairwe J, Amstutz A, et al. Effect of Offering Same-Day ART vs Usual Health Facility Referral During Home-Based HIV Testing on Linkage to Care and Viral Suppression Among Adults With HIV in Lesotho: The CASCADE Randomized Clinical Trial. *Jama.* 2018;319(11):1103-12.
37. Kopo M, Lejone TI, Tschumi N, Glass TR, Kao M, Brown JA, et al. Effectiveness of a peer educator-coordinated preference-based differentiated service delivery model on viral suppression among young people living with HIV in Lesotho: The PEBRA cluster-randomized trial. *PLoS Med.* 2023;20(1):e1004150.

**Table 1: Baseline characteristics of those newly diagnosed and previously diagnosed with HIV**

| Characteristics                 |                          | Newly diagnosed, n (row %) |                        |                   |                         |                           | Previously diagnosed, n (row %) |                                    |                            |
|---------------------------------|--------------------------|----------------------------|------------------------|-------------------|-------------------------|---------------------------|---------------------------------|------------------------------------|----------------------------|
|                                 |                          | Total (n=377)              | Linkage unknown (n=38) | No linkage (n=74) | Linked elsewhere (n=31) | Linked to CHIEDZA (n=234) | Total (n=1156)*                 | Transferred care to CHIEDZA (n=66) | In care elsewhere (n=1090) |
| <b>Age (years)</b>              | 16-19                    | 114                        | 17 (14.9)              | 31 (27.2)         | 7 (6.1)                 | 59 (51.8)                 | 328                             | 22 (6.7)                           | 306 (93.3)                 |
|                                 | 20-24                    | 263                        | 21 (8.0)               | 43 (16.4)         | 24 (9.1)                | 175 (66.5)                | 828                             | 44 (5.3)                           | 784 (94.7)                 |
| <b>Sex</b>                      | Male                     | 41                         | 8 (19.5)               | 8 (19.5)          | 1 (2.4)                 | 24 (58.5)                 | 121                             | 3 (2.5)                            | 118 (97.5)                 |
|                                 | Female                   | 336                        | 30 (8.9)               | 66 (19.6)         | 30 (8.9)                | 210 (62.5)                | 1035                            | 63 (6.1)                           | 972 (93.9)                 |
| <b>Province</b>                 | Harare                   | 124                        | 12 (9.7)               | 19 (15.3)         | 12 (9.7)                | 81 (65.3)                 | 365                             | 10 (2.7)                           | 355 (97.3)                 |
|                                 | Bulawayo                 | 92                         | 6 (6.5)                | 29 (31.5)         | 3 (3.3)                 | 54 (58.7)                 | 353                             | 3 (0.9)                            | 350 (98.3)                 |
|                                 | Mashonaland East         | 161                        | 20 (12.4)              | 26 (16.2)         | 16 (9.9)                | 99 (61.5)                 | 438                             | 53 (12.1)                          | 385 (87.5)                 |
| <b>Self-reported HIV status</b> | Unknown                  | 163                        | 23 (14.1)              | 28 (17.2)         | 13 (8.0)                | 99 (60.7)                 | NA                              | NA                                 | NA                         |
|                                 | Tested HIV-ve >6mths ago | 173                        | 12 (6.9)               | 36 (20.8)         | 16 (9.3)                | 109 (63.0)                | NA                              | NA                                 | NA                         |
|                                 | Tested HIV-ve <6mths ago | 41                         | 3 (7.3)                | 10 (24.4)         | 2 (4.9)                 | 26 (63.4)                 | NA                              | NA                                 | NA                         |

\*Excluding 6 for whom ART treatment status is unknown



**Figure 1: Flowchart of young people living with HIV who accessed CHIEDZA services**

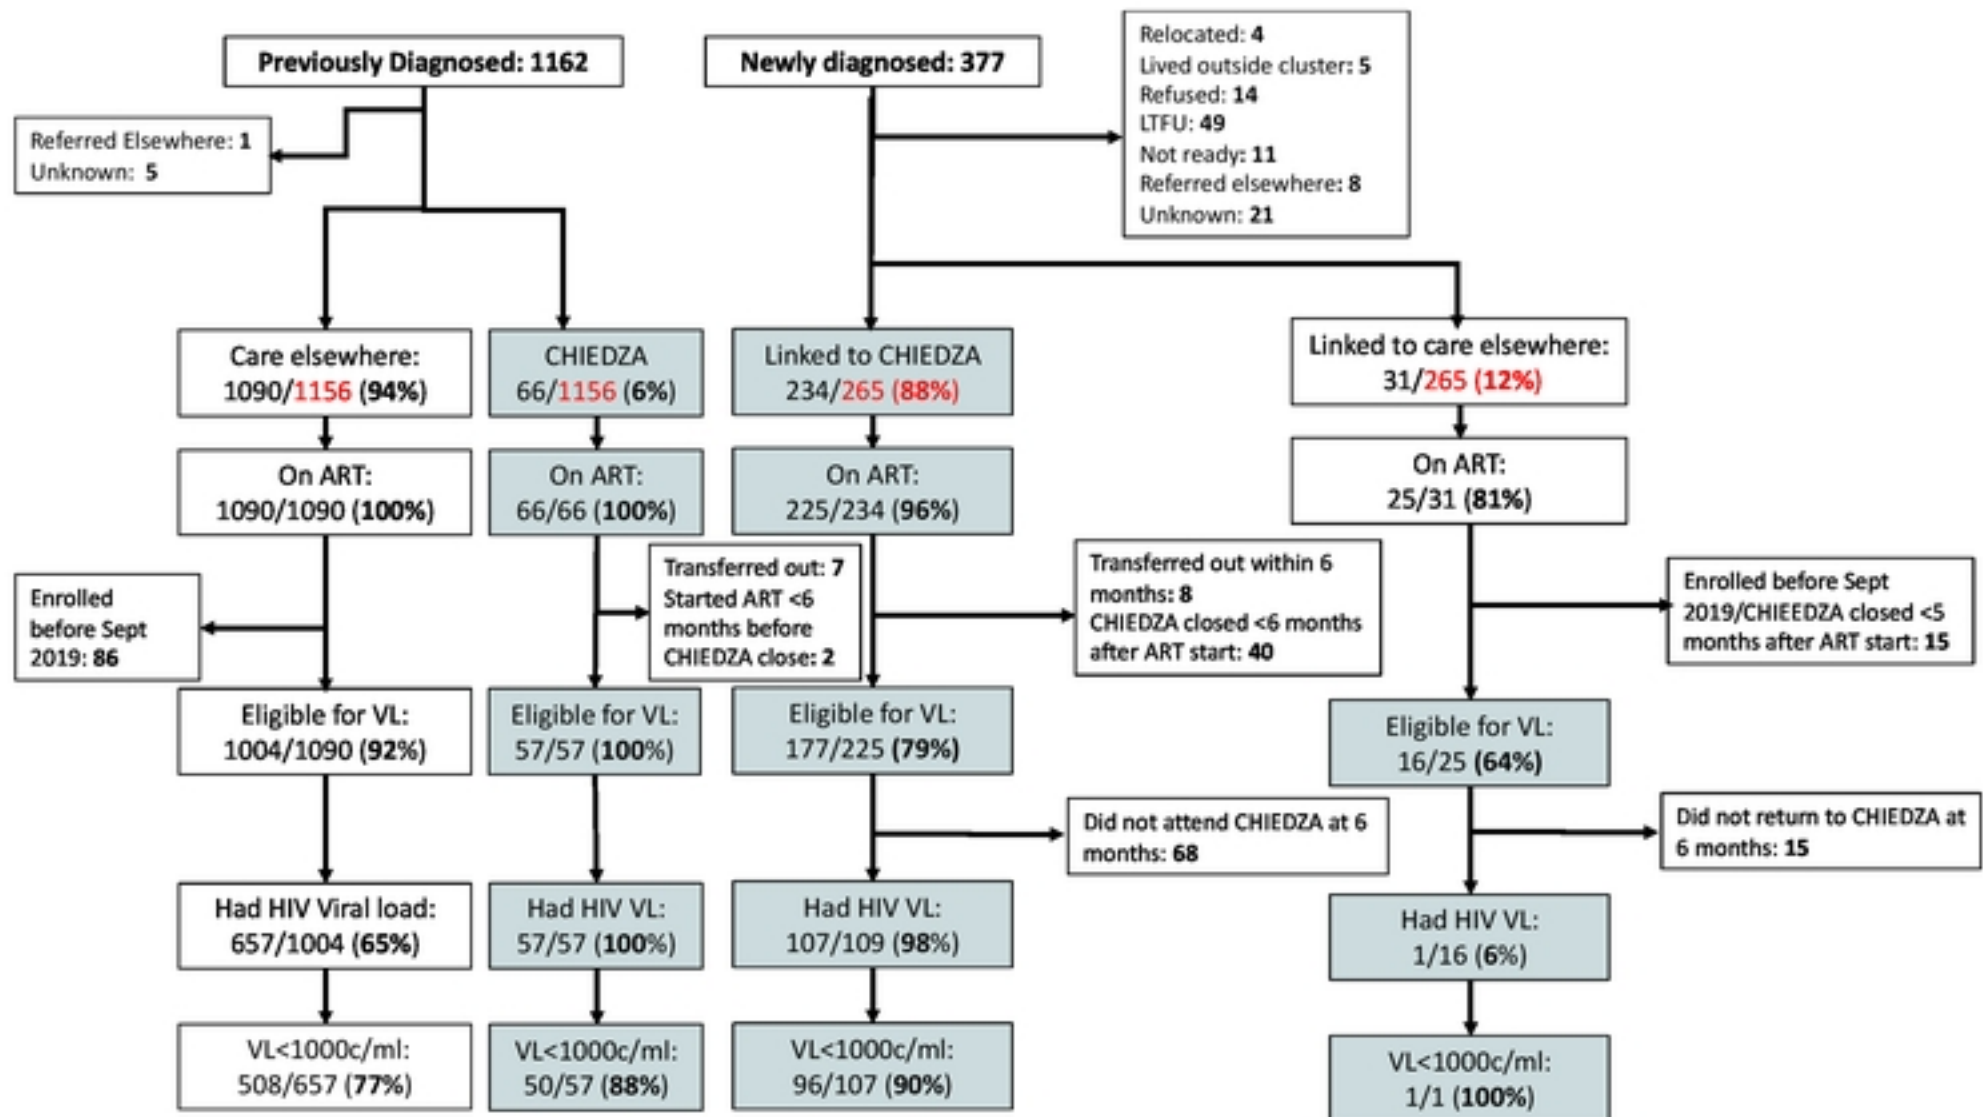



**Figure 2: Number and timing of CHIEDZA young people peer support (CAPS) groups**

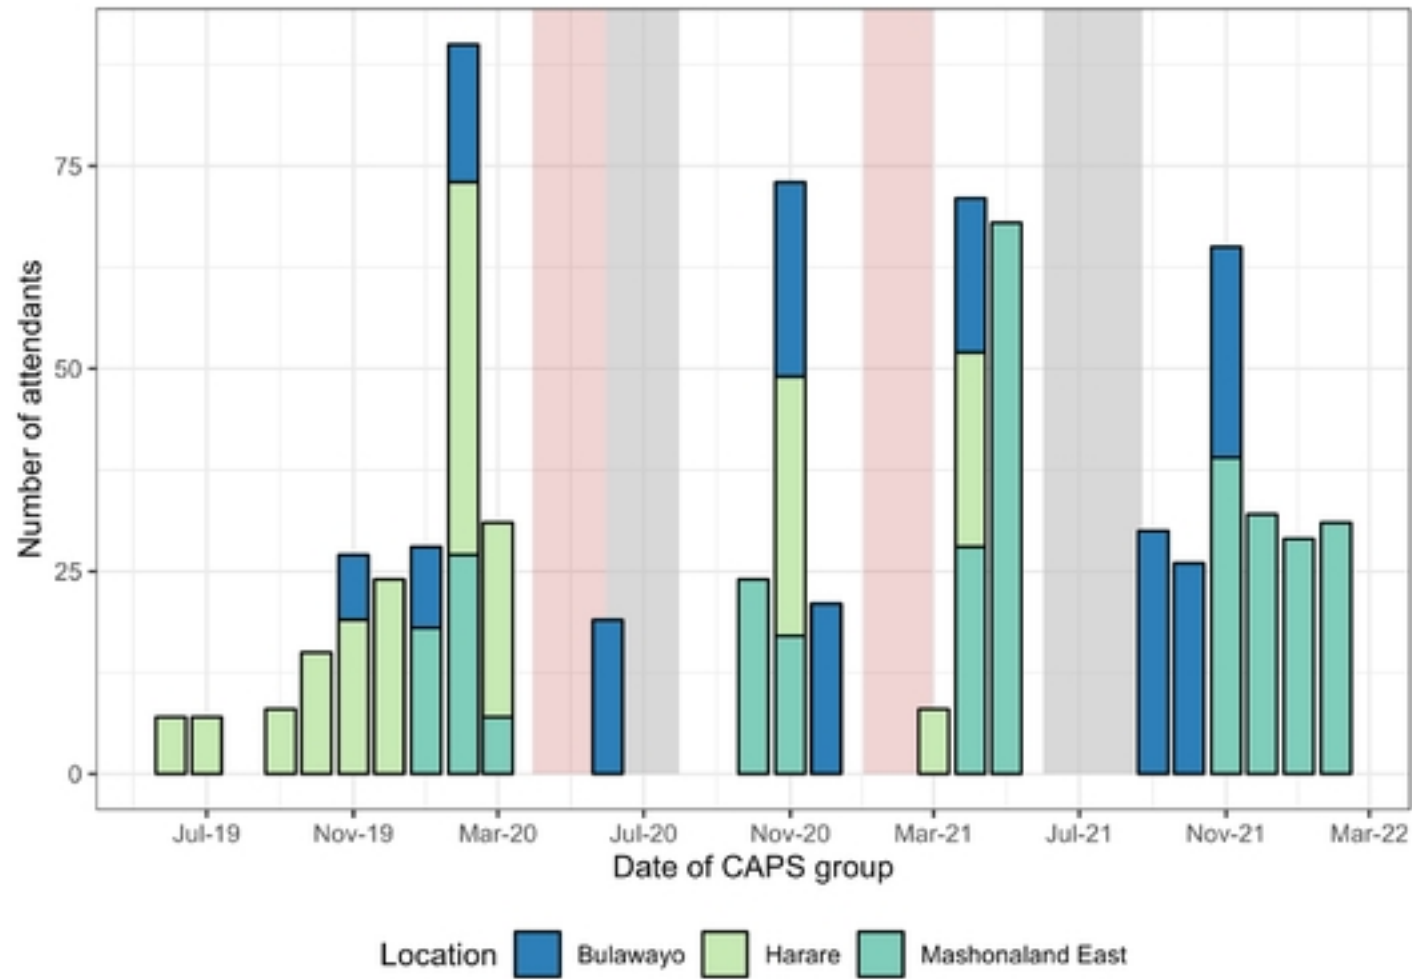

Grey shaded areas travel restrictions and reduced working hours  
 Pink shaded areas indicate national lockdowns
